# Supplementary material for: 77Se-Enriched Selenoglycoside Enables Significant Enhancement in NMR Spectroscopic Monitoring of Glycan–Protein Interactions
Source: MDPI journal article supplement (doi:10.3390/pharmaceutics14010201), 2022-01-15
Supplement: s1 [file s1]

# Supplementary Materials: $^{77}\text{Se}$ -Enriched Selenoglycoside Enables Significant Enhancement in NMR Spectroscopic Monitoring of Glycan–Protein Interactions

István Timári, Sára Balla, Krisztina Fehér, Katalin E. Kövér, and László Szilágyi

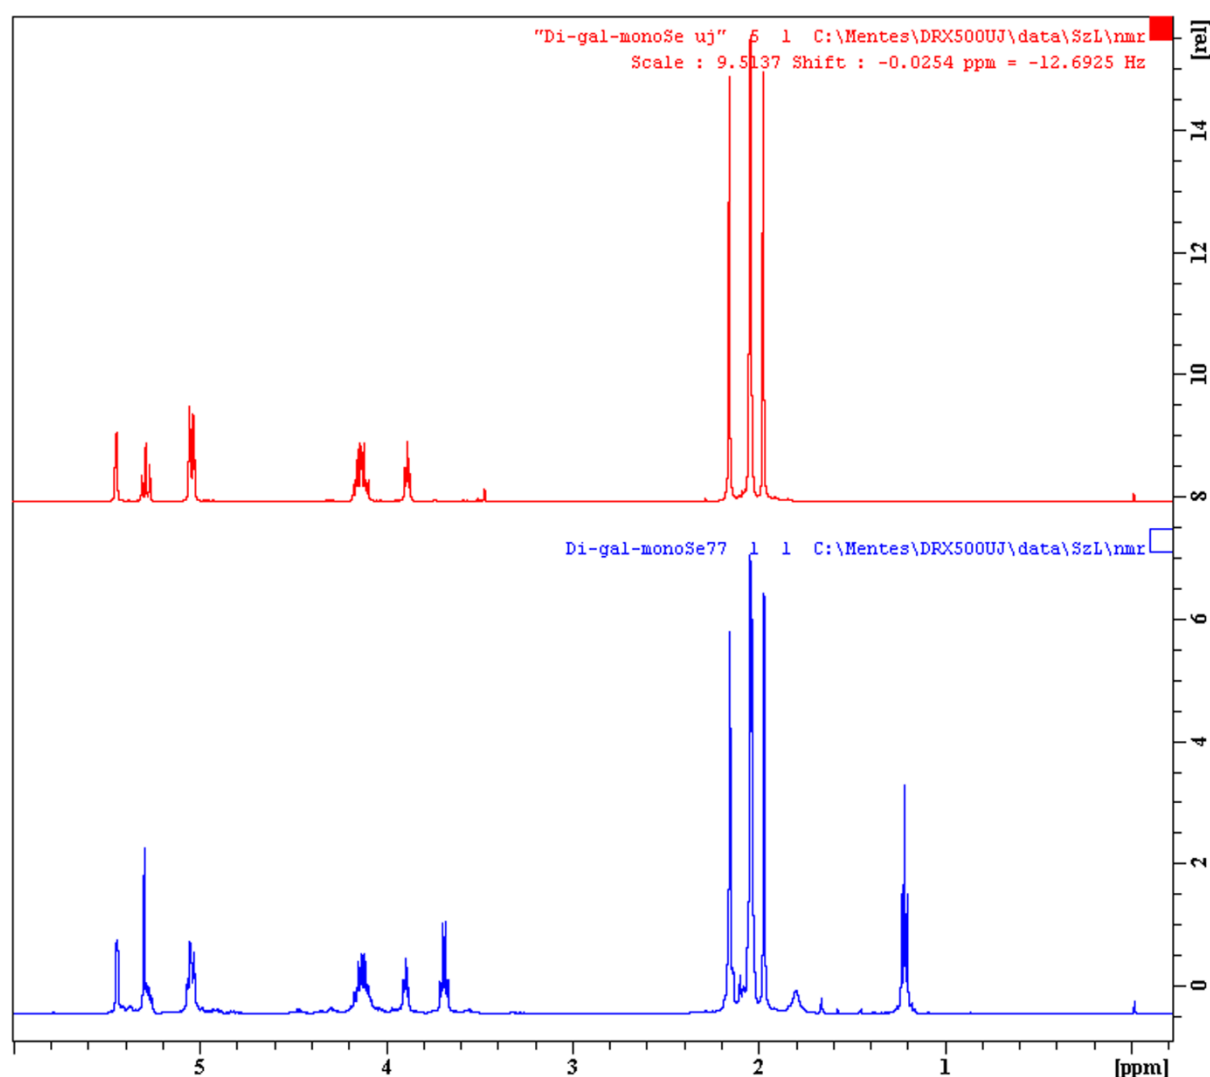

**Figure S1.** 500 MHz  $^1\text{H}$  NMR spectrum of di(2,3,4,6-tetra-*O*-acetyl- $\beta$ -D-galactopyranosyl)selenide (2) (99%  $^{77}\text{Se}$ -enriched, bottom), compared to the spectrum of the same compound with  $^{77}\text{Se}$  in natural abundance (top) in  $\text{CDCl}_3$ .

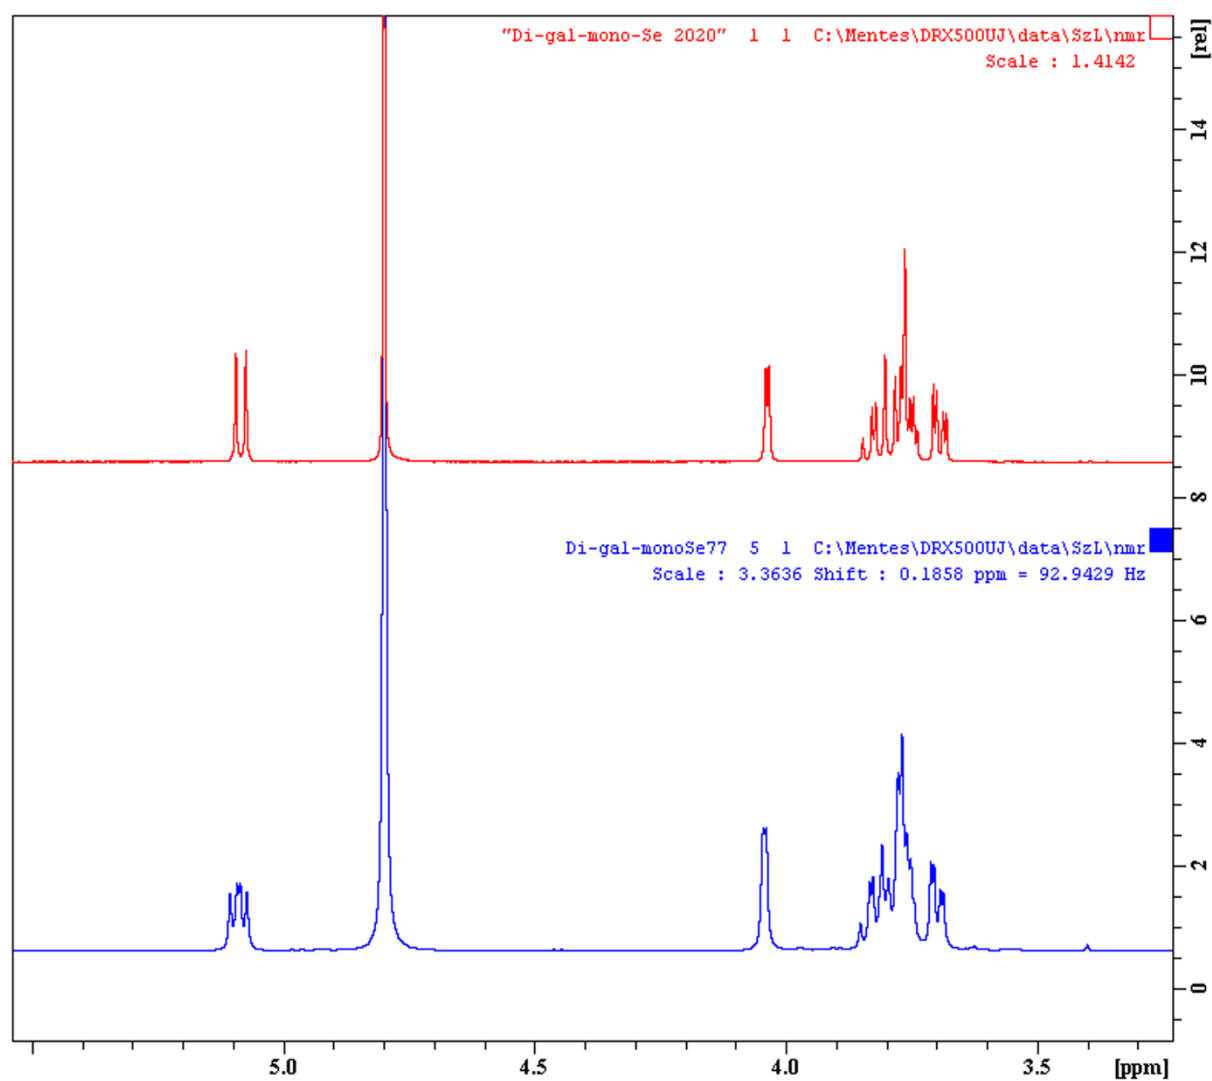

**Figure S2.** 500 MHz  $^1\text{H}$  NMR spectrum of  $[^{77}\text{Se}]\text{DG}$ , **3** (99%  $^{77}\text{Se}$ -enriched, bottom), compared to the spectrum of SeDG ( $^{77}\text{Se}$  in natural abundance, top) in  $\text{D}_2\text{O}$ .

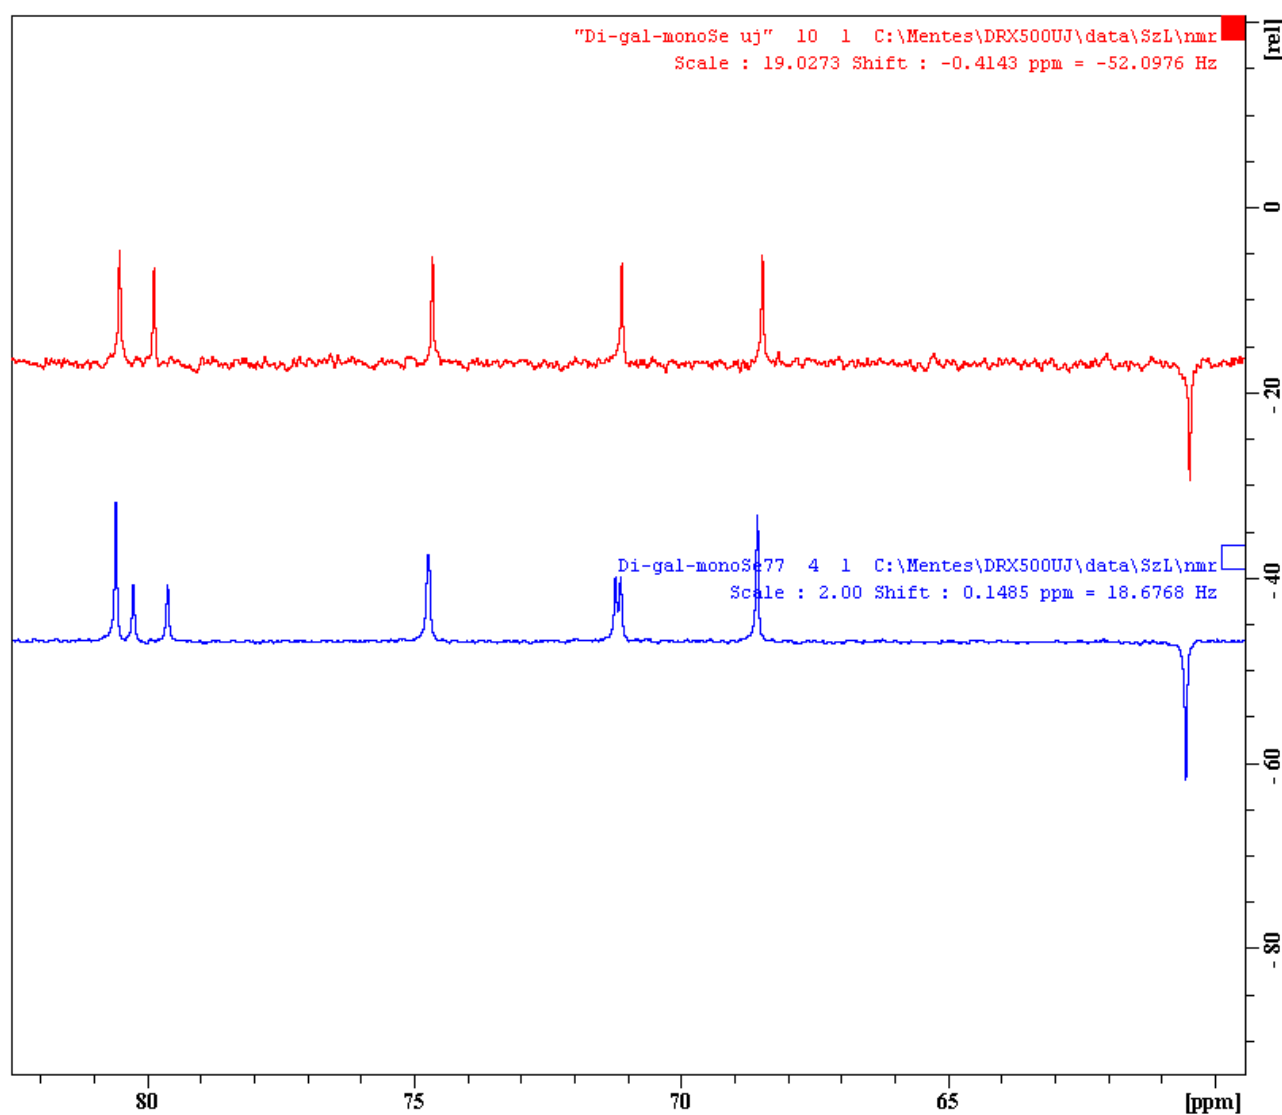

**Figure S3.** 125 MHz  $^{13}\text{C}$  NMR spectrum of  $[^{77}\text{Se}]\text{DG}$ , **3** (99%  $^{77}\text{Se}$ -enriched, bottom), compared to the spectrum of SeDG ( $^{77}\text{Se}$  in natural abundance, top) in  $\text{DMSO}-d_6$ .

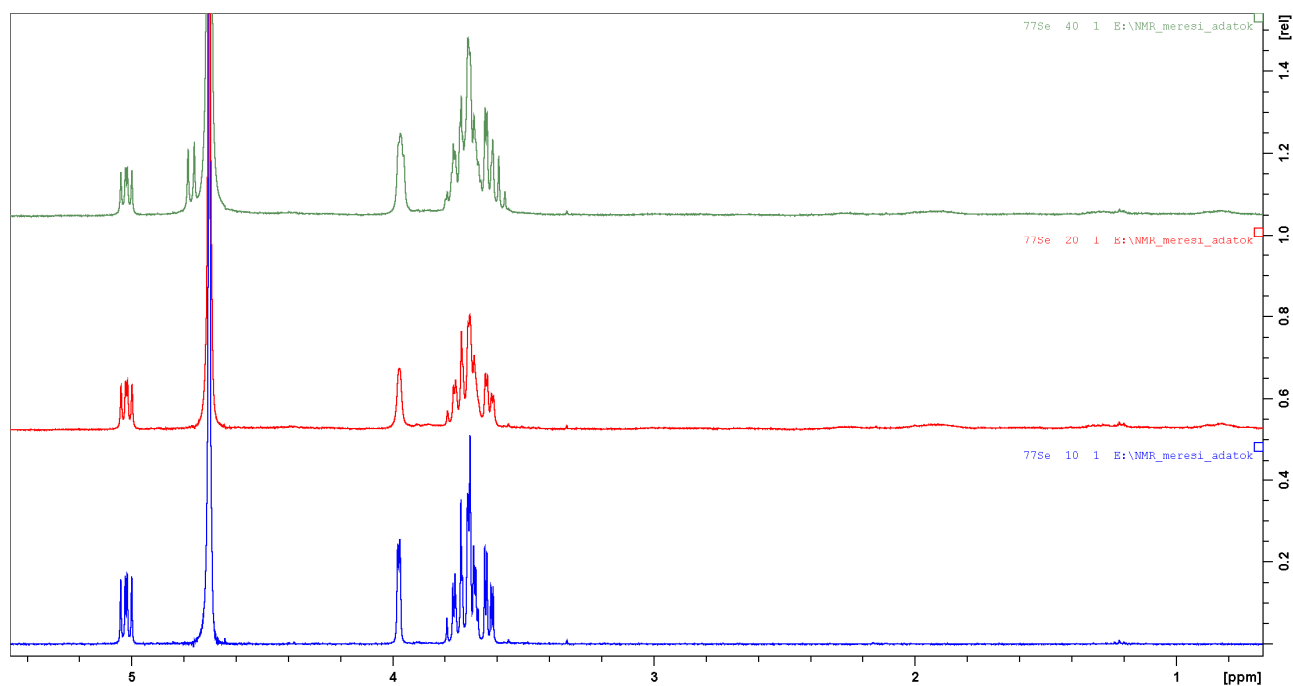

**Figure S4.** 400 MHz <sup>1</sup>H NMR spectra obtained on samples of [<sup>77</sup>Se]DGal (2 mM) in the absence of *h*Gal-3 (bottom, blue), [<sup>77</sup>Se]DGal (2 mM) and *h*Gal-3 (29 μM, i.e. molar ratio = 1 : 0.0145) (middle, red) and [<sup>77</sup>Se]DGal (2 mM), TDG (2 mM) and *h*Gal-3 (29 μM, i.e. molar ratio = 1 : 1 : 0.0145) (top, green) in D<sub>2</sub>O.
